# Supplementary material
Source: Royal Society of Chemistry journal article supplement (doi:10.1039/d6tc00872k)
Supplement: d6tc00872k1.pdf [file d6tc00872k1.pdf]

# Supporting Information

## Multilayer Heterostructure Engineering for Ultrapure and Area Emission in Perovskite Quantum-Dot Light-Emitting Transistors

Min Guo, Jia Li, Guozhen Bai, Xinmu Chen, Zihong Yang, Xiaolong Li, Yali Yu, Jiayang Jiang, Feng Teng, and Yufeng Hu\*

Key Laboratory of Luminescence and Optical Information, Ministry of Education, Institute of Optoelectronic Technology, Beijing Jiaotong University, Beijing, 100044, P.R. China

E-mail: yfhu@bjtu.edu.cn, fteng@bjtu.edu.cn

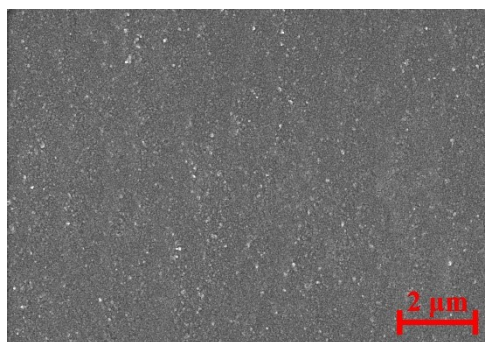

Figure S1. The SEM image of the CsPbBr<sub>3</sub> QD film spin-coated on the ZTO.

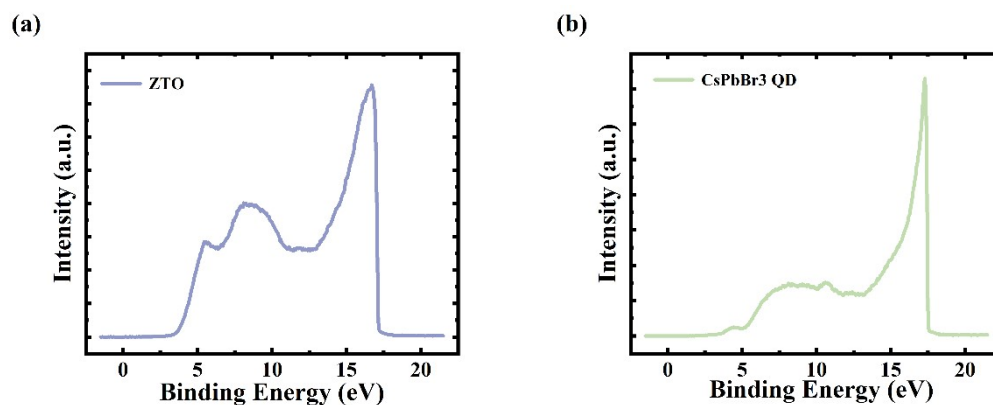

Figure S2. UPS spectra of the ZTO film and CsPbBr<sub>3</sub> QD film.

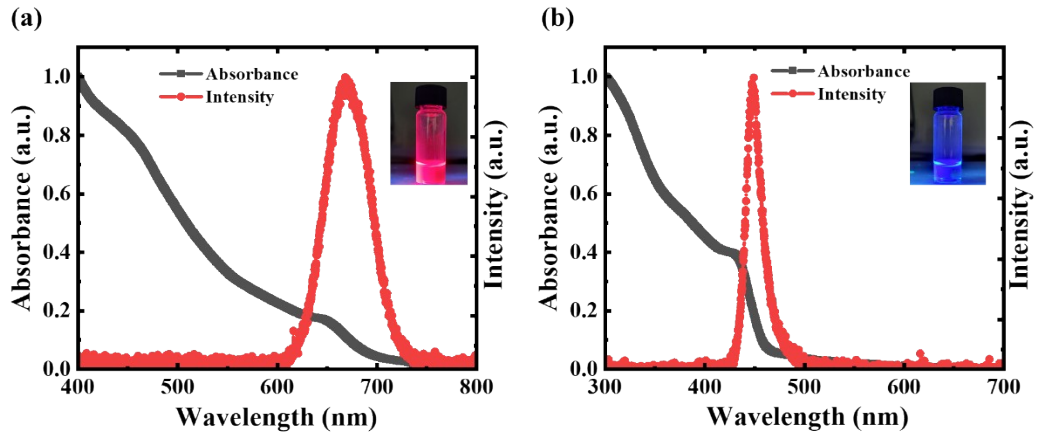

Figure S3. (a) Absorption spectra and PL spectra of the synthesized CsPbI<sub>3</sub> perovskite QD dispersion. (b) Absorption spectra and PL spectra of the synthesized CsPbBr<sub>x</sub>Cl<sub>3-x</sub> perovskite QD dispersion.

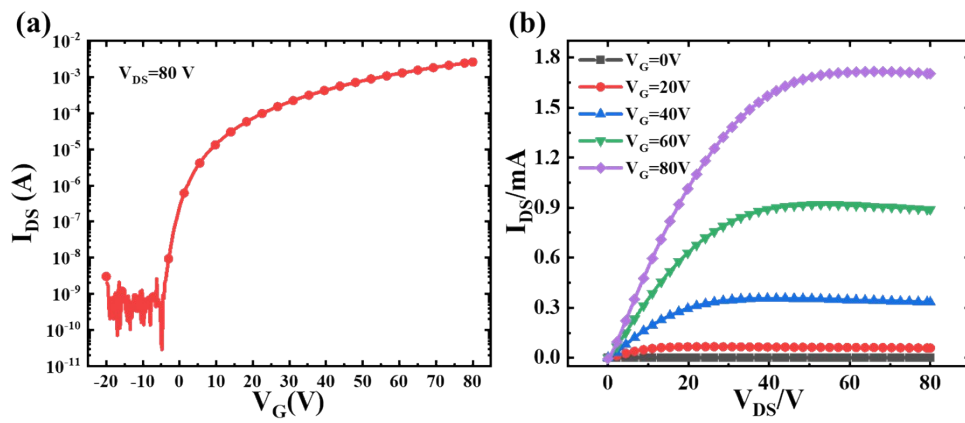

Figure S4. ZTO field-effect transistor transfer curve and output curve.

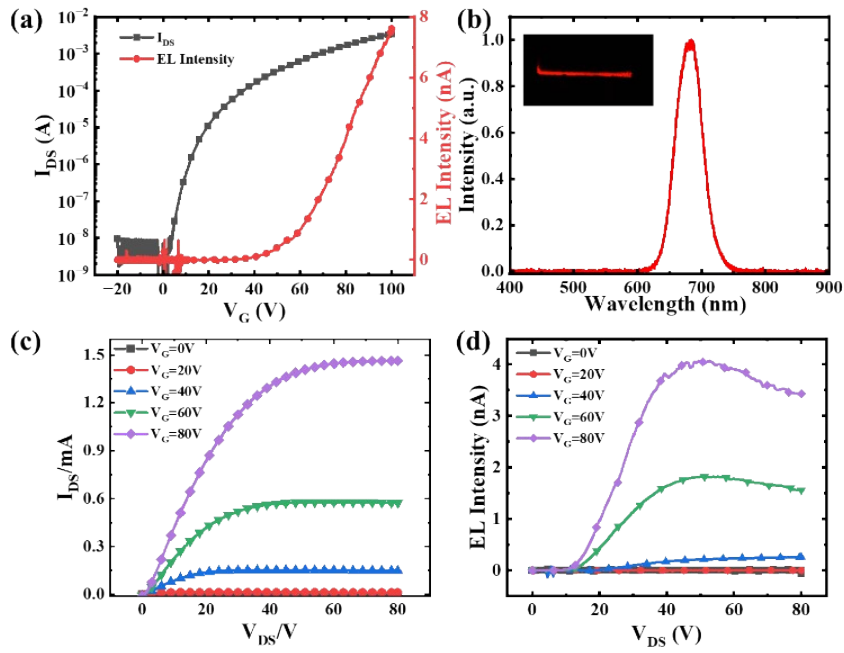

Figure S5. (a) the drain current transfer curve and the electroluminescence intensity transfer characteristics of the fabricated multi-layer LET device based CsPbI<sub>3</sub> QD emissive layer. (b) electroluminescence spectrum of ZTO/CsPbI<sub>3</sub> LET (inset is the picture of line EL along the drain electrode edge next to the channel). (c) electrical output curve of ZTO/CsPbI<sub>3</sub> LET. (d) electroluminescence output curve of ZTO/CsPbI<sub>3</sub> LET.

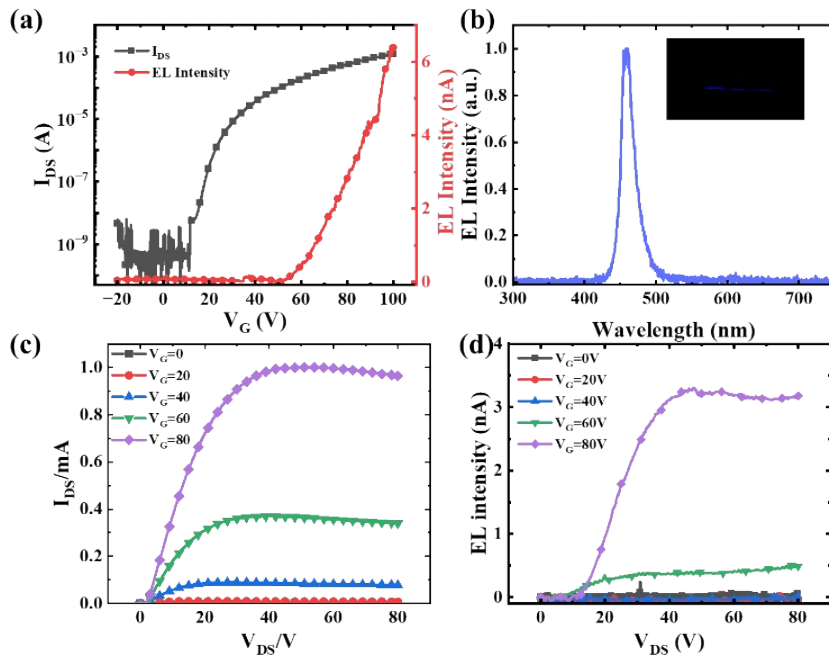

Figure S6. (a) the drain current transfer curve and the electroluminescence intensity transfer characteristics of the fabricated multi-layer LET device based CsPbBr<sub>x</sub>Cl<sub>3-x</sub> QD emissive layer. (b) electroluminescence spectrum of ZTO/CsPbBr<sub>x</sub>Cl<sub>3-x</sub> LET (inset is the picture of line EL along the drain electrode edge next to the channel). (c) electrical

output curve of ZTO/CsPbBr<sub>x</sub>Cl<sub>3-x</sub> LET. (d) electroluminescence output curve of ZTO/CsPbBr<sub>x</sub>Cl<sub>3-x</sub> LET.

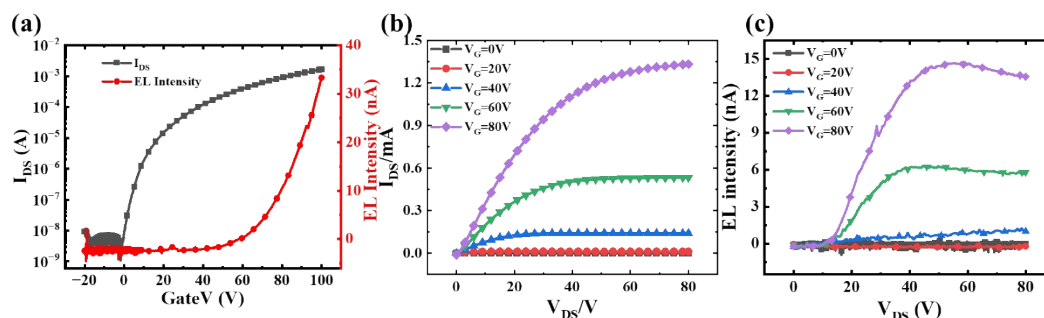

Figure S7. (a) the drain current transfer curve and the electroluminescence intensity transfer characteristics of the fabricated multi-layer area emission LET device based CsPbI<sub>3</sub> emissive layer. (b) electrical output curve. (c) electroluminescence output curve of area emission ZTO/CsPbI<sub>3</sub> LET.

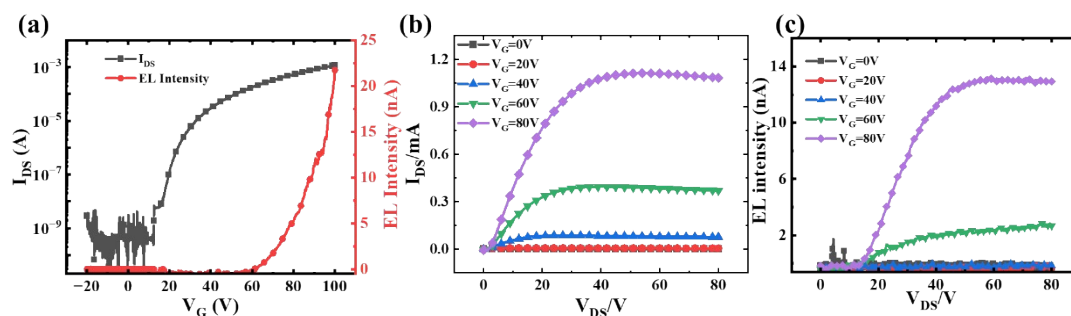

Figure S8. (a) the drain current transfer curve and the electroluminescence intensity transfer characteristics of the fabricated multi-layer area emission LET device based CsPbBr<sub>x</sub>Cl<sub>3-x</sub> emissive layer. (b) electrical output curve. (c) electroluminescence output curve of area emission ZTO/CsPbBr<sub>x</sub>Cl<sub>3-x</sub> LET.

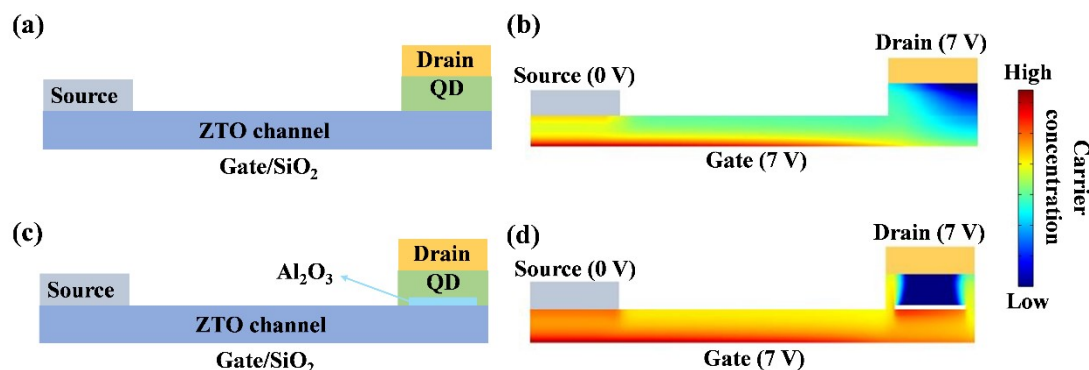

Figure S9. Schematic illustration of (a) the conventional LET device structure and (b) the simulation of its charge carrier distribution; (c) the area emission LET with Al<sub>2</sub>O<sub>3</sub>(5 nm) device structure and (d) the simulation of its charge carrier distribution.

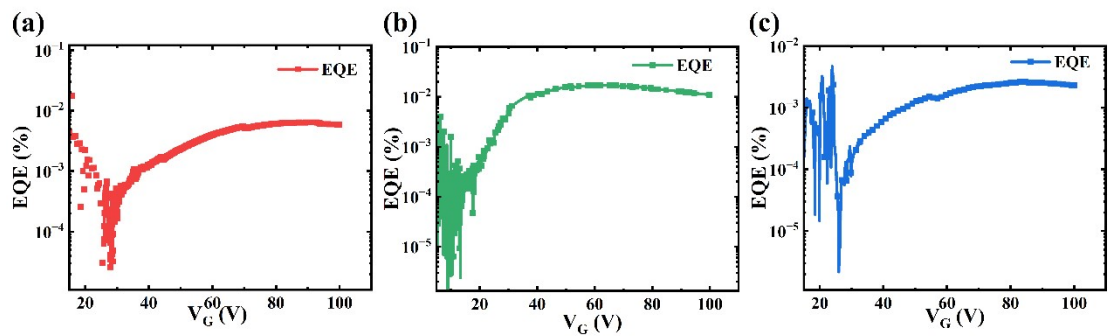

Figure S10. The EQE of the fabricated area emission RGB perovskite LET.

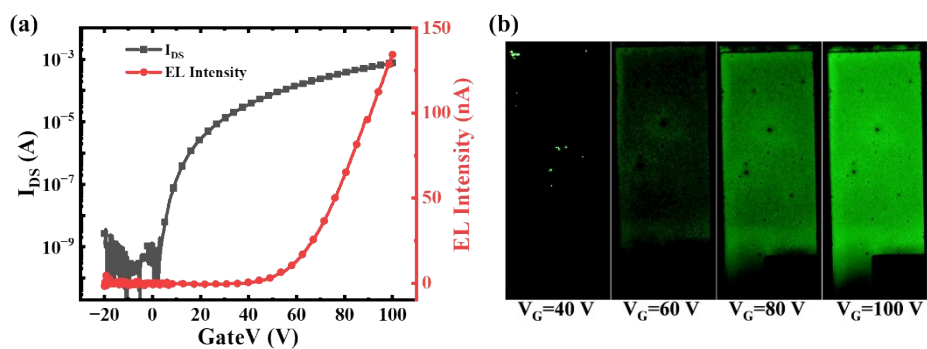

Figure S11. The fabricated multi-layer area emission LET device with 15nm  $\text{Al}_2\text{O}_3$  layer. (a) the drain current transfer curve and the electroluminescence intensity transfer characteristics. (b) electroluminescence picture at different  $V_G$ .
